# Supplementary material for: Hesitancy, reactogenicity and immunogenicity of the mRNA and whole-virus inactivated Covid-19 vaccines in pediatric neuromuscular diseases
Source: PubMed Central journal article supplement — Hum Vaccin Immunother. 2023 May 9;19(1):2206278. doi: 10.1080/21645515.2023.2206278 (PMC10294767; doi:10.1080/21645515.2023.2206278), 2023-05-09
Supplement: KHVI_A_2206278_SM1825.pdf [file KHVI_A_2206278_SM1825.pdf]

## *Supplementary Material*

### **Hesitancy, reactogenicity and immunogenicity of the mRNA and whole-virus inactivated COVID-19 vaccines in pediatric neuromuscular diseases**

Michael Kwan Leung Yu<sup>a</sup>, Sophelia Hoi Shan Chan<sup>a</sup>, Samuel Cheng<sup>b</sup>, Daniel Leung<sup>a</sup>, Sau Man Chan<sup>a</sup>, Amy Suen Ka Yan<sup>a</sup>, Wilfred Hing Sang Wong<sup>a</sup>, Malik Peiris<sup>b\*</sup>, Yu Lung Lau<sup>a\*</sup>, Jaime S Rosa Duque<sup>a\*</sup>

<sup>1</sup>*Department of Paediatrics and Adolescent Medicine, The University of Hong Kong, Hong Kong Special Administrative Region, China*

<sup>2</sup>*School of Public Health, The University of Hong Kong, Hong Kong Special Administrative Region, China*

\*These authors contributed equally to this work and share last authorship

\* Correspondence:

Jaime S Rosa Duque, MD, PhD

Fax: (852) 2855-1523 Email: [jsrduque@hku.hk](mailto:jsrduque@hku.hk)

Yu Lung Lau, MBChB, MD(Hons)

Fax: (852) 2855-1523 Email: [lauylung@hku.hk](mailto:lauylung@hku.hk)

Malik Peiris, MBBS, DPhil

Fax: (852) 2855-1523 Email: [malik@hku.hk](mailto:malik@hku.hk)

## 1 Supplementary Data

### Survey questions on COVID-19 vaccine hesitancy

| No. | Questions                                                                                                 | Answer                                                                    |
|-----|-----------------------------------------------------------------------------------------------------------|---------------------------------------------------------------------------|
| 1   | Patients consent                                                                                          | Agree / Not agree                                                         |
| 2   | Did your father receive COVID-19 vaccine?                                                                 | <input type="radio"/> Yes (1)<br><input type="radio"/> No (2)             |
| 3   | Did your mother receive COVID-19 vaccine?                                                                 | <input type="radio"/> Yes (1)<br><input type="radio"/> No (2)             |
| 4   | Did any other family member receive COVID-19 vaccine?                                                     | <input type="radio"/> Yes (1)<br><input type="radio"/> No (2)             |
| 5   | Do you need to use wheelchair?                                                                            | <input type="radio"/> Yes (1)<br><input type="radio"/> No (2)             |
| 6   | Do you need to use Ryle's tube or PEG tube feeding?                                                       | <input type="radio"/> Yes (1)<br><input type="radio"/> No (2)             |
| 7   | Do you need to use ventilator?                                                                            | <input type="radio"/> Yes (1)<br><input type="radio"/> No (2)             |
| 8   | Have you used spinal brace / performed spinal surgery?                                                    | <input type="radio"/> Yes (1)<br><input type="radio"/> No (2)             |
| 9   | English full name                                                                                         |                                                                           |
| 10  | Age (years)                                                                                               |                                                                           |
| 11  | Gender                                                                                                    | <input type="radio"/> Male (1)<br><input type="radio"/> Female (2)        |
| 12  | Did you get the flu vaccine last year?                                                                    | <input type="radio"/> Yes (1)<br><input type="radio"/> No (2)             |
| 13  | Have you received the flu vaccine every year in the past three years?                                     | <input type="radio"/> Yes (1)<br><input type="radio"/> No (2)             |
| 14  | Have you been diagnosed with COVID-19?                                                                    | <input type="radio"/> Yes (1)<br><input type="radio"/> No (2)             |
| 15  | Have your family members or classmates been diagnosed with COVID-19 disease?                              | <input type="radio"/> Yes (1)<br><input type="radio"/> No (2)             |
| 16  | Have you ever been classified as a close contact of COVID-19 that needs to undergo compulsory quarantine? | <input type="radio"/> Yes (1)<br><input type="radio"/> No (2)             |
| 17  | Have you ever been required to compulsorily test the COVID-19 virus?                                      | <input type="radio"/> Yes (1)<br><input type="radio"/> No (2)             |
| 18  | What COVID-19 vaccine have you or do you plan to receive?                                                 | <input type="radio"/> BNT162b2 (1)<br><input type="radio"/> Coronavac (2) |

|    |                                      |                                                                                                                                                                                                                                                                                                                                                                                                                                                                                                                                                                                                                                                                                                                                                                                                                                                                                                                                                                                                                                                                                                                                                                                                                                                                                                                                                                                                                                                             |
|----|--------------------------------------|-------------------------------------------------------------------------------------------------------------------------------------------------------------------------------------------------------------------------------------------------------------------------------------------------------------------------------------------------------------------------------------------------------------------------------------------------------------------------------------------------------------------------------------------------------------------------------------------------------------------------------------------------------------------------------------------------------------------------------------------------------------------------------------------------------------------------------------------------------------------------------------------------------------------------------------------------------------------------------------------------------------------------------------------------------------------------------------------------------------------------------------------------------------------------------------------------------------------------------------------------------------------------------------------------------------------------------------------------------------------------------------------------------------------------------------------------------------|
|    |                                      | o Undecided (3)                                                                                                                                                                                                                                                                                                                                                                                                                                                                                                                                                                                                                                                                                                                                                                                                                                                                                                                                                                                                                                                                                                                                                                                                                                                                                                                                                                                                                                             |
| 19 | Reasons to have vaccination?         | <input type="checkbox"/> I think I am high risk group of COVID-19 (1)<br><input type="checkbox"/> I am worried that I will be infected (2)<br><input type="checkbox"/> I want to protect my family (3)<br><input type="checkbox"/> I want to attend religious ceremonies (4)<br><input type="checkbox"/> I want to travel (5)<br><input type="checkbox"/> I wish to return to my life before COVID-19 pandemic (6)<br><input type="checkbox"/> I am tired of the social distancing policies (7)<br><input type="checkbox"/> Because people around me received vaccination (8)<br><input type="checkbox"/> I want to resume full scale face-to-face teaching. (9)<br><input type="checkbox"/> I want to play sports at school with friends or in a competition without wearing mask (10)<br><input type="checkbox"/> I want to meet my family as I am currently living at special schools (11)<br><input type="checkbox"/> I want to play music safely (e.g. wind instruments, band, choir) (12)<br><input type="checkbox"/> I want to participate in large-scale events (e.g. open days, joint school events and Christmas balls) without wearing mask (13)<br><input type="checkbox"/> I want to study overseas (14)<br><input type="checkbox"/> I want to join study tours (15)<br><input type="checkbox"/> Socialize with large groups of friends, (e.g. dining out, karaoke, party room) (16)<br><input type="checkbox"/> Others (please specify): (17) |
| 20 | Reasons for not to have vaccination? | <input type="checkbox"/> Not allowed by my parents (1)<br><input type="checkbox"/> Medically not suitable (e.g. severe allergies, uncontrolled diabetes mellitus) (2)<br><input type="checkbox"/> I am concerned about its safety (3)<br><input type="checkbox"/> I am concerned about its efficacy (4)<br><input type="checkbox"/> I am concerned that receiving the vaccine will violate the rules of my religion (5)<br><input type="checkbox"/> I am concerned that I will have a higher chance to encounter adverse effects when compared to healthy individuals (6)<br><input type="checkbox"/> I am concerned that the vaccination would affect my current                                                                                                                                                                                                                                                                                                                                                                                                                                                                                                                                                                                                                                                                                                                                                                                           |

treatment (7)

- COVID-19 is just a mild disease (8)
- I do not know where to receive the vaccines (9)
- I am difficult to access the vaccine centres (10)
- I do not know whether I should receive the vaccine (11)
- The community vaccine centres are inconvenient (12)
- I do not know which type of COVID-19 vaccine I should receive (13)
- Facemask and social distancing are sufficient (14)
- Depends on the progress of the pandemic (15)
- I am against vaccination (16)
- Others (please specify): (17)

## 2 Supplementary Tables and Figures

### 2.1 Supplementary Tables

Supplementary Table 1: Demographic and clinical characteristics of the patients with neuromuscular diseases in COVID-19 vaccine hesitancy survey arm of the study

|                                          | N/mean | %/SD |
|------------------------------------------|--------|------|
| Demographics                             |        |      |
| Age (years)                              | 13.8   | 3.4  |
| Female                                   | 18     | 43.9 |
| Breakdown of NMDs                        |        |      |
| Spinal muscular atrophy                  | 18     | 43.9 |
| 5q type I                                | 2      | 4.9  |
| 5q type II                               | 10     | 24.4 |
| 5q type III                              | 5      | 12.2 |
| Non-5q spinal muscular atrophy           | 1      | 2.4  |
| Dystrophinopathy                         | 6      | 14.6 |
| Duchenne muscular dystrophy              | 4      | 9.8  |
| Becker muscular dystrophy                | 2      | 4.9  |
| Congenital myopathy                      | 5      | 12.2 |
| Congenital muscular dystrophy            | 4      | 9.8  |
| Peripheral neuropathies                  | 2      | 4.9  |
| Facioscapulohumeral muscular dystrophy   | 2      | 4.9  |
| Myotonic disorder                        | 2      | 4.9  |
| Other NMDs <sup>^</sup>                  | 2      | 4.9  |
| Physical conditions                      |        |      |
| Wheelchair-mobile                        | 22     | 53.7 |
| Nasogastric tube or PEG tube feeding use | 4      | 9.8  |
| Ventilator support                       | 14     | 34.1 |
| Using spinal brace or had spinal surgery | 8      | 19.5 |

NMDs=neuromuscular diseases, PEG=percutaneous endoscopic gastrostomy, SD=standard deviation, N=numbers

<sup>^</sup>Congenital myasthenic syndrome and ocular myasthenia gravis

Supplementary Table 2: Intention of COVID-19 vaccination in patients with neuromuscular diseases in January and April 2022

| Intention of COVID-19 vaccination                 | January 2022 | April 2022 | <i>p</i> -values |
|---------------------------------------------------|--------------|------------|------------------|
| Have vaccinated/ planning to vaccinate            | 30 (73.2)    | 40 (97.6)  |                  |
| Do not plan to vaccinate                          | 11 (26.8)    | 1 (2.4)    |                  |
| Total                                             | 41           | 41         | 0.003**          |
| Will continue to receive future boosters, if any? |              |            |                  |
| Yes                                               | 26 (63.4)    | 30 (73.2)  |                  |
| No                                                | 15 (36.6)    | 11 (26.8)  |                  |
| Total                                             | 41           | 41         | 0.477            |

Data presented as number (%)

\*\* $p < 0.01$

Supplementary Table 3: Preference on COVID-19 vaccines in patients with neuromuscular diseases

| Types of vaccines        | January 2022        |                    |           | April 2022          |                    |           |
|--------------------------|---------------------|--------------------|-----------|---------------------|--------------------|-----------|
|                          | Planning to receive | Already vaccinated | Total     | Planning to receive | Already vaccinated | Total     |
| BNT162b2                 | 5 (33.3)            | 14 (93.3)          | 19 (46.3) | 3 (100.0)           | 17 (45.9)          | 20 (48.8) |
| CoronaVac                | 8 (53.3)            | 1 (6.7)            | 9 (22.0)  | 0 (0.0)             | 20 (54.1)          | 20 (48.8) |
| Undecided                | 2 (13.3)            | 0 (0.0)            | 2 (4.9)   | 0 (0.0)             | 0 (0.0)            | 0 (0.0)   |
| Do not plan to vaccinate | -                   | -                  | 11 (26.8) | -                   | -                  | 1 (2.4)   |
| Total                    | 15                  | 15                 | 41        | 3                   | 37                 | 41        |

Data presented as number (%)

Supplementary Table 4: Demographic and clinical characteristics of the patients with neuromuscular diseases in the COVID-19 vaccine reactogenicity and immunogenicity arm of the study

| Patient         | NMD type | Age (years) | Sex    | Ambulatory status  | Treatment    | Dosage              | Dose 1 & 2 | Dose 3    | COVID-19 infection             |
|-----------------|----------|-------------|--------|--------------------|--------------|---------------------|------------|-----------|--------------------------------|
| 1               | CIDP     | 14.6        | Male   | Independent walker | IVIG         | 2 g/kg/3months      | BNT162b2   | N/A       | N                              |
| 2               | DMD      | 12.2        | Male   | Late ambulatory    | Prednisolone | 0.42 mg/kg/day      | BNT162b2   | BNT162b2  | N                              |
| 3               | DMD      | 13.7        | Male   | Wheelchair mobile  | Deflazacort  | 0.64 mg/kg/day      | BNT162b2   | N/A       | N                              |
| 4               | CM       | 11.9        | Female | Independent walker | N/A          | N/A                 | BNT162b2   | N/A       | Y, before 1 <sup>st</sup> dose |
| 5               | SMA      | 10.5        | Male   | Wheelchair mobile  | Risdiplam    | 0.13 mg/kg/day      | BNT162b2   | N/A       | N                              |
| 6               | SMA      | 8.8         | Male   | Independent walker | Nusinersen   | N/A                 | BNT162b2   | BNT162b2  | N                              |
| 7               | DMD      | 13.1        | Male   | Late ambulatory    | Prednisolone | 0.61 mg/kg/day      | CoronaVac  | CoronaVac | N                              |
| 8               | DMD      | 14.5        | Male   | Wheelchair mobile  | Prednisolone | 0.30 mg/kg/day      | CoronaVac  | N/A       | N                              |
| 9               | DMD      | 4.7         | Male   | Independent walker | Deflazacort  | 0.64 mg/kg/day      | CoronaVac  | CoronaVac | N                              |
| 10              | SMA      | 8.4         | Female | Wheelchair mobile  | Nusinersen   | 0.56 mg/kg/day      | CoronaVac  | N/A       | Y, after 1 <sup>st</sup> dose  |
| 11              | SMA      | 5.8         | Male   | Wheelchair mobile  | Nusinersen   | 0.56 mg/kg/day      | CoronaVac  | CoronaVac | N                              |
| 12 <sup>^</sup> | CM       | 7.4         | Female | Wheelchair mobile  | N/A          | N/A                 | CoronaVac  | BNT162b2  | N                              |
| 13              | DMD      | 6.6         | Male   | Late ambulatory    | Deflazacort  | 0.74 mg/kg/day      | CoronaVac  | CoronaVac | N                              |
| 14              | SMA      | 2.9         | Female | Wheelchair mobile  | Nusinersen   | 0.83 mg/kg/4 months | CoronaVac  | CoronaVac | N                              |
| 15              | DMD      | 11.3        | Male   | Wheelchair mobile  | Deflazacort  | 0.67 mg/kg/day      | CoronaVac  | N/A       | Y, before 1 <sup>st</sup> dose |
| 16              | MD       | 6.7         | Female | Independent walker | Melatonin    | 5.45 mg/kg/day      | CoronaVac  | CoronaVac | N                              |
| 17              | DMD      | 21.0        | Male   | Wheelchair mobile  | Prednisolone | 0.49 mg/kg/day      | CoronaVac  | CoronaVac | N                              |
| 18*             | SMA      | 10.3        | Male   | Independent walker | Nusinersen   | 0.38 mg/kg/4months  | CoronaVac  | N/A       | N                              |
| 19*             | DMD      | 6.0         | Male   | Independent walker | Prednisolone | 0.72 mg/kg/day      | CoronaVac  | N/A       | N                              |
| 20*             | SMA      | 12.8        | Female | Wheelchair mobile  | Nusinersen   | 0.48 mg/kg/4months  | CoronaVac  | N/A       | N                              |
| 21*             | BMD      | 10.5        | Male   | Independent walker | N/A          | N/A                 | CoronaVac  | CoronaVac | N                              |
| 22*             | CM       | 14.0        | Female | Late ambulatory    | N/A          | N/A                 | CoronaVac  | CoronaVac | N                              |

BMD=Becker muscular dystrophy, CIDP=chronic inflammatory demyelinating polyneuropathy, CM=congenital myopathy, DMD=Duchenne muscular dystrophy, IVIG=intravenous immunoglobulins, MD=myotonic disorder, N/A=not applicable, SMA=spinal muscular atrophy

<sup>^</sup>Blood samples for immunogenicity assay before the first and after the third dose of COVID-19 vaccination

\*Blood samples for immunogenicity assay after the second dose of COVID-19 vaccination only

Supplementary Table 5: Comparison of age between patients with neuromuscular diseases (NMDs) and healthy children and adolescents (Healthy)

| <b>Dosage</b>   | <b>B</b>   | <b>C</b>   | <b>BB</b>  | <b>CC</b>  | <b>BBB</b> | <b>CCC</b> | <b>CCB</b> |
|-----------------|------------|------------|------------|------------|------------|------------|------------|
| Age             |            |            |            |            |            |            |            |
| NMD (N)         | 11.3 (5)   | 13.1 (7)   | 11.3 (5)   | 11.9 (13)  | 10.9 (2)   | 6.68 (9)   | 8.44 (1)   |
| Healthy (N)     | 13.9 (107) | 14.0 (173) | 14.0 (104) | 14.0 (173) | 13.7 (28)  | 14.1 (60)  | 10.8 (6)   |
| <i>p</i> -value | 0.008**    | 0.061      | 0.011*     | <0.001***  | 0.005**    | 0.003**    | N/A        |

Data presented as median (number of patients in each group)

Healthy=healthy children and adolescents, NMDs=patients with neuromuscular diseases

B, 1 dose of BNT162b2; BB, 2 doses of BNT162b2; C, 1 dose of CoronaVac; CC, 2 doses of CoronaVac; BBB, 3 dose of BNT162b2; CCC, 3 doses of CoronaVac; CCB, 2 doses of CoronaVac and 1 dose of BNT162b2.

\* $p < 0.05$ , \*\* $p < 0.01$ , \*\*\* $p < 0.001$



Supplementary Table 6: Comparison of reactogenicity for patients with neuromuscular diseases by age

| <b>Dosage</b>                                              | <b>B</b> | <b>C</b> | <b>BB</b> | <b>CC</b> | <b>BBB</b> | <b>CCC</b> | <b>CCB</b> |
|------------------------------------------------------------|----------|----------|-----------|-----------|------------|------------|------------|
| <b>Pain at injection site</b>                              |          |          |           |           |            |            |            |
| 2-11 years old                                             | 2 (67.7) | 5 (62.5) | 0 (0)     | 6 (75.0)  | 0 (0)      | 4 (66.7)   | 1 (100)    |
| 12-21 years old                                            | 3 (100)  | 0 (0)    | 3 (100)   | 0 (0)     | 1 (100)    | 1 (33.3)   | 0 (0)      |
| <i>p</i> -value                                            | 1.000    | 0.182    | 0.100     | 0.061     | 1.000      | 0.524      | 1.000      |
| <b>Swelling, erythema and induration at injection site</b> |          |          |           |           |            |            |            |
| 2-11 years old                                             | 0 (0)    | 2 (25.0) | 0 (0)     | 1 (12.5)  | 0 (0)      | 1 (16.7)   | 0 (0)      |
| 12-21 years old                                            | 0 (0)    | 0 (0)    | 0 (0)     | 0 (0)     | 0 (0)      | 0 (0)      | 0 (0)      |
| <i>p</i> -value                                            | N/A      | 1.000    | N/A       | 1.000     | N/A        | 1.000      | N/A        |
| <b>Headache</b>                                            |          |          |           |           |            |            |            |
| 2-11 years old                                             | 0 (0)    | 0 (0)    | 1 (33.3)  | 0 (0)     | 0 (0)      | 0 (0)      | 0 (0)      |
| 12-21 years old                                            | 0 (0)    | 1 (33.3) | 2 (66.7)  | 1 (33.3)  | 1 (100)    | 2 (66.7)   | 0 (0)      |
| <i>p</i> -value                                            | N/A      | 0.273    | 1.000     | 0.273     | 1.000      | 0.083      | N/A        |
| <b>Fatigue</b>                                             |          |          |           |           |            |            |            |
| 2-11 years old                                             | 0 (0)    | 2 (25.0) | 1 (33.3)  | 4 (50.0)  | 0 (0)      | 2 (33.3)   | 1 (100)    |
| 12-21 years old                                            | 3 (100)  | 2 (66.7) | 3 (100)   | 1 (33.3)  | 0 (0)      | 3 (100)    | 0 (0)      |
| <i>p</i> -value                                            | 0.100    | 0.491    | 0.400     | 1.000     | N/A        | 0.167      | N/A        |
| <b>Myalgia</b>                                             |          |          |           |           |            |            |            |
| 2-11 years old                                             | 0 (0)    | 2 (25.0) | 0 (0)     | 3 (37.5)  | 0 (0)      | 2 (33.3)   | 0 (0)      |
| 12-21 years old                                            | 2 (66.7) | 1 (33.3) | 1 (33.3)  | 0 (0)     | 0 (0)      | 0 (0)      | 0 (0)      |
| <i>p</i> -value                                            | 0.400    | 1.000    | 1.000     | 0.491     | N/A        | 0.500      | N/A        |
| <b>Fever</b>                                               |          |          |           |           |            |            |            |
| 2-11 years old                                             | 0 (0)    | 2 (25.0) | 1 (33.3)  | 1 (12.5)  | 0 (0)      | 0 (0)      | 0 (0)      |
| 12-21 years old                                            | 0 (0)    | 0 (0)    | 0 (0)     | 0 (0)     | 1 (100)    | 0 (0)      | 0 (0)      |
| <i>p</i> -value                                            | N/A      | 1.000    | 1.000     | 1.000     | 1.000      | N/A        | N/A        |
| <b>Abdominal pain</b>                                      |          |          |           |           |            |            |            |
| 2-11 years old                                             | 0 (0)    | 1 (12.5) | 0 (0)     | 1 (12.5)  | 0 (0)      | 0 (0)      | 0 (0)      |
| 12-21 years old                                            | 0 (0)    | 0 (0)    | 0 (0)     | 0 (0)     | 0 (0)      | 0 (0)      | 0 (0)      |
| <i>p</i> -value                                            | N/A      | 1.000    | N/A       | 1.000     | N/A        | N/A        | N/A        |
| <b>Antipyretic use</b>                                     |          |          |           |           |            |            |            |
| 2-11 years old                                             | 0 (0)    | 0 (0)    | 0 (0)     | 0 (0)     | 0 (0)      | 0 (0)      | 0 (0)      |
| 12-21 years old                                            | 1 (33.3) | 0 (0)    | 2 (66.7)  | 0 (0)     | 1 (100)    | 0 (0)      | 0 (0)      |
| <i>p</i> -value                                            | 1.000    | N/A      | 0.670     | N/A       | 1.000      | N/A        | N/A        |

Data presented as number (%)

No patient reported any of the following symptoms within 7 days after vaccination: pruritis at injection site, reduced appetite or sore throat.

One patient reported any of the following symptoms within 7 days after vaccination: nausea, diarrhea, vomiting, arthralgia, cough, chills, rhinorrhea, nasal congestion

B, 1 dose of BNT162b2; BB, 2 doses of BNT162b2; C, 1 dose of CoronaVac; CC, 2 doses of CoronaVac; BBB, 3 dose of BNT162b2; CCC, 3 doses of CoronaVac; CCB, 2 doses of CoronaVac and 1 dose of BNT162b2.

Supplementary Table 7: Comparison of immunogenicity for patients with neuromuscular diseases by corticosteroids use

| <b>Dosage</b>            | <b>B</b> | <b>C</b> | <b>BB</b> | <b>CC</b> | <b>BBB</b> | <b>CCC</b> | <b>CCB</b> |
|--------------------------|----------|----------|-----------|-----------|------------|------------|------------|
| <b>ELISA OD450</b>       |          |          |           |           |            |            |            |
| CS user median (N)       | 0.87 (2) | 0.25 (5) | 1.82 (2)  | 1.82 (5)  | 3.04 (1)   | 2.26 (4)   | N/A        |
| Non-CS user median (N)   | 1.35 (3) | 1.30 (2) | 2.58 (3)  | 2.37 (8)  | 3.19 (1)   | 3.04 (5)   | 3.42 (1)   |
| <i>p</i> -value          | 0.800    | 0.238    | 0.20      | 0.020*    | N/A        | 0.111      | N/A        |
| <b>sVNT % inhibition</b> |          |          |           |           |            |            |            |
| CS user median (N)       | 55.3 (2) | 15.0 (5) | 93.9 (2)  | 84.5 (5)  | 97.2 (1)   | 83.1 (4)   | N/A        |
| Non-CS user median (N)   | 50.5 (3) | 37.6 (2) | 96.3 (3)  | 89.3 (8)  | 97.3 (1)   | 95.7 (5)   | 97.2 (1)   |
| <i>p</i> -value          | 0.800    | 0.857    | 0.80      | 0.354     | N/A        | 0.191      | N/A        |

Data presented as median (number of patients in group)

CS=corticosteroids, ELISA=enzyme linked immunosorbent assay, N/A=Not applicable,

OD=optical density, sVNT=surrogate virus neutralization test

B, 1 dose of BNT162b2; BB, 2 doses of BNT162b2; C, 1 dose of CoronaVac; CC, 2 doses of CoronaVac; BBB, 3 dose of BNT162b2; CCC, 3 doses of CoronaVac; CCB, 2 doses of CoronaVac and 1 dose of BNT162b2.

\**p*<0.05

Supplementary Table 8: Comparison of immunogenicity for patients with neuromuscular diseases by disease subtypes

| Dosage            |                 | B        | C        | BB       | CC       | BBB      | CCC      | CCB      |
|-------------------|-----------------|----------|----------|----------|----------|----------|----------|----------|
| ELISA OD450       |                 |          |          |          |          |          |          |          |
|                   | DMD             | 0.87 (2) | 0.25 (5) | 1.82 (2) | 1.82 (6) | 3.04 (1) | 2.26 (4) | N/A      |
|                   | SMA             | 1.44 (2) | 1.52 (1) | 2.74 (2) | 2.54 (4) | 3.25 (1) | 3.39 (2) | N/A      |
|                   | CM              | N/A      | N/A      | N/A      | 2.03 (1) | N/A      | 3.04 (1) | 3.42 (1) |
|                   | BMD             | N/A      | N/A      | N/A      | 1.97 (1) | N/A      | 2.52 (1) | N/A      |
|                   | CIDP            | 0.56 (1) | N/A      | 2.19 (1) | N/A      | N/A      | N/A      | N/A      |
|                   | MD              | N/A      | 1.08 (1) | N/A      | 2.43 (1) | N/A      | 4.31 (1) | N/A      |
|                   | <i>p</i> -value | 0.200    | 0.238    | 0.200    | 0.015*   | N/A      | 0.20     | N/A      |
| sVNT % inhibition |                 |          |          |          |          |          |          |          |
|                   | DMD             | 55.3 (2) | 15.0 (5) | 93.8 (2) | 74.4 (6) | 97.2 (1) | 83.1 (4) | N/A      |
|                   | SMA             | 45.9 (2) | 43.0 (1) | 95.3 (2) | 91.1 (4) | 97.3 (1) | 95.4 (2) | N/A      |
|                   | CM              | N/A      | N/A      | N/A      | 64.3 (1) | N/A      | 95.7 (1) | 97.2 (1) |
|                   | BMD             | N/A      | N/A      | N/A      | 80.9 (1) | N/A      | 86.0 (1) | N/A      |
|                   | CIDP            | 66.7 (1) | N/A      | 97.2 (1) | N/A      | N/A      | N/A      | N/A      |
|                   | MD              | N/A      | 32.1 (1) | N/A      | 97.0 (1) | N/A      | 97.3 (1) | N/A      |
|                   | <i>p</i> -value | 0.200    | 1.000    | 0.600    | 0.033*   | N/A      | 0.470    | N/A      |

Data presented as median (number of patients in each group)

No patient reported any of the following symptoms within 7 days after vaccination: pruritis at injection site, reduced appetite or sore throat.

BMD=Becker muscular dystrophy, CIDP=chronic inflammatory demyelinating polyneuropathy, CM=congenital myopathy, DMD=Duchenne muscular dystrophy, ELISA=enzyme linked immunosorbent assay, MD=myotonic disorder, N/A=not applicable, OD=optical density, SMA=spinal muscular atrophy, sVNT=surrogate virus neutralization test

B, 1 dose of BNT162b2; BB, 2 doses of BNT162b2; C, 1 dose of CoronaVac; CC, 2 doses of CoronaVac; BBB, 3 dose of BNT162b2; CCC, 3 doses of CoronaVac; CCB, 2 doses of CoronaVac and 1 dose of BNT162b2.

\* $p < 0.05$

Supplementary Table 9: Immunogenicity of patients with neuromuscular diseases who had COVID-19 infection

| Patient No. | Vaccine | Age  | Sex | COVID-19 history      | Pre-dose 1 ELISA OD450 | Pre-dose 1 sVNT % inhibition | Dose 1 ELISA OD450 | Dose 1 sVNT % inhibition | Dose 2 ELISA OD450 | Dose 2 sVNT % inhibition |
|-------------|---------|------|-----|-----------------------|------------------------|------------------------------|--------------------|--------------------------|--------------------|--------------------------|
| 4           | BB      | 11.9 | F   | 6 weeks before dose 1 | 0.25                   | 15                           | 2.56               | 86.6                     | 3.14               | 97.8                     |
| 10          | CC      | 8.4  | F   | 3 weeks after dose 1  | N/A                    | N/A                          | 1.14               | 36.1                     | 2.98               | 92.4                     |
| 15          | CC      | 11.3 | M   | 1 month before dose 1 | 0.51                   | 15                           | 0.53               | 15                       | 1.34               | 15                       |

These patients were excluded from the main immunogenicity analyses.

ELISA=enzyme linked immunosorbent assay, OD=optical density, sVNT=surrogate virus neutralization test

BB, 2 doses of BNT162b2; CC, 2 doses of CoronaVac

## 2.2 Supplementary Figures

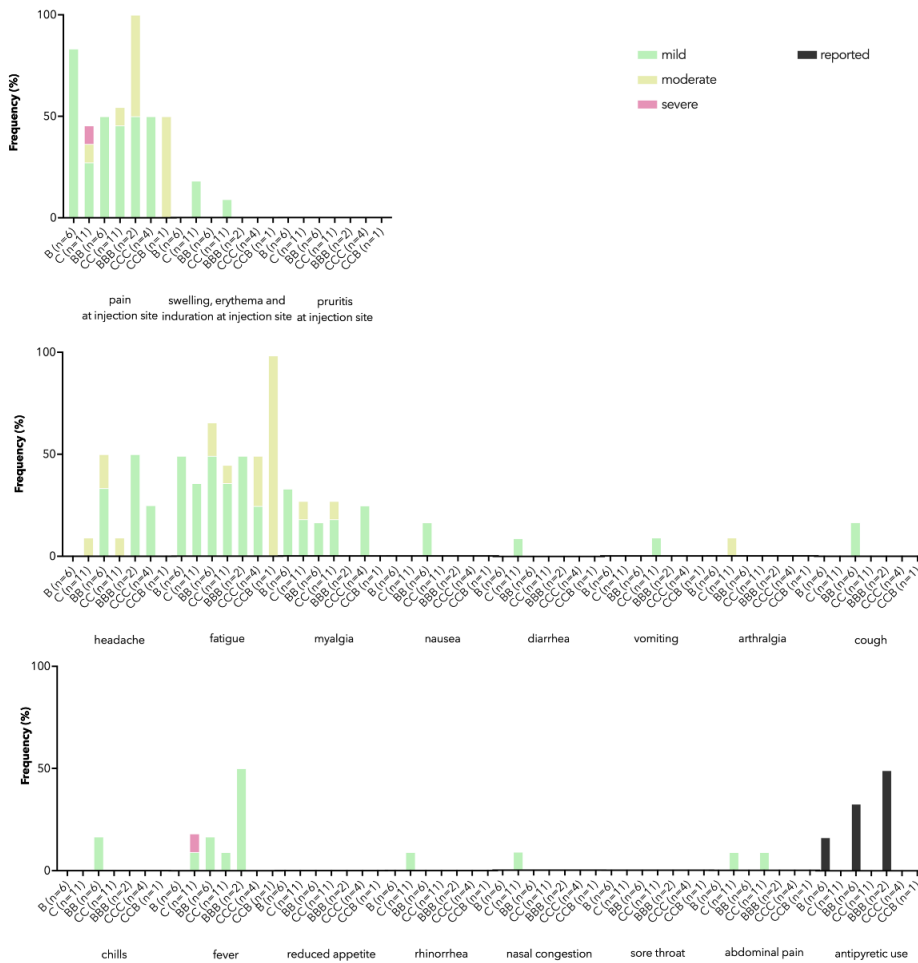

Supplementary Figure 1: Reactogenicity for patients with neuromuscular diseases

Pain at the injection site (BB: 3 of 6, 50.0%, 6 of 11, CC: 54.5%), fatigue (BB: 4 of 6, 66.7%, 5 of 11, CC: 45.5%) and myalgia (BB: 1 of 6, 16.7%, 3 of 11, CC: 27.3%) were the commonest ARs in NMD patients. Most ARs were mild (75.5%, n=71/94). Adverse reactions were reported by the patients for 7 days after vaccination. No patient reported any of the following symptoms within 7 days after vaccination: pruritis at injection site, reduced appetite or sore throat. There were no vaccine-related severe adverse events, such as hospitalizations, life-threatening complications, disabilities or deaths. B, 1 dose of BNT162b2; BB, 2 doses of BNT162b2; C, 1 dose of CoronaVac; CC, 2 doses of CoronaVac; BBB, 3 dose of BNT162b2; CCC, 3 doses of CoronaVac; CCB, 2 doses of CoronaVac and 1 dose of BNT162b2.

Supplementary Figure 2: Correlation between the enzyme linked immunosorbent assay (ELISA) after  $\log_{10}$  transformation and the surrogate virus neutralization test (sVNT) after BNT162b2 and CoronaVac in patients with neuromuscular diseases (NMDs) (n=42) and healthy children and adolescents (Healthy) (n=648); total n=690.

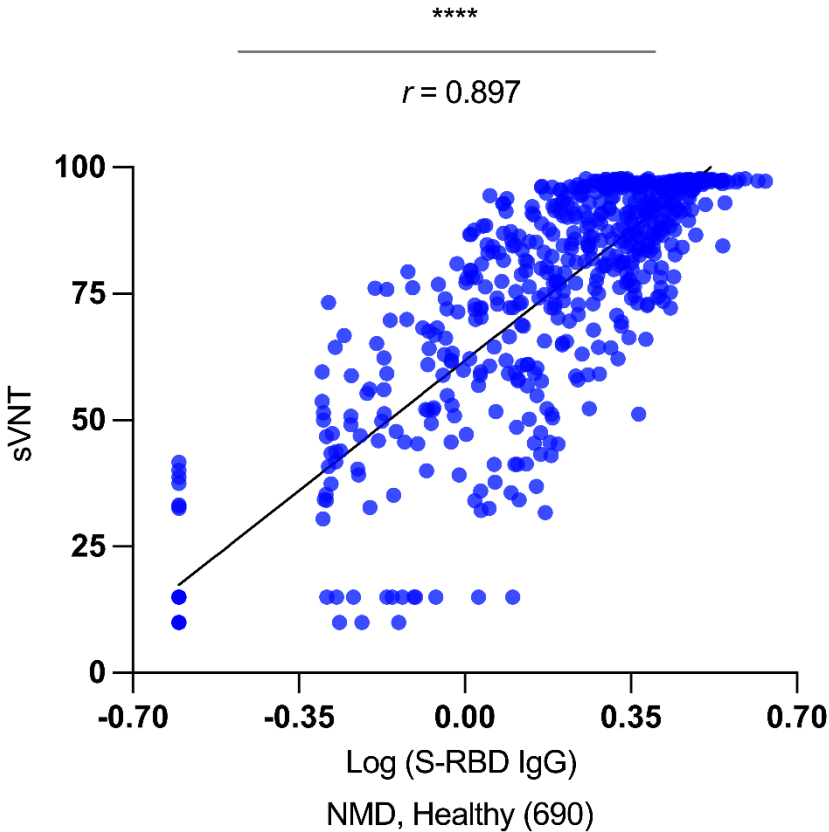

The Pearson correlation coefficient was 0.897 ( $p < 0.0001$ ). ELISA OD450 and sVNT% inhibition were determined before the first dose, second dose, 7-43 days after the second dose and 14-49 days after the third dose of BNT162b2 or CoronaVac. Three patients with neuromuscular diseases who had COVID-19 infection were excluded from the correlation analysis. ELISA=enzyme linked immunosorbent assay, Healthy=healthy children and adolescents, NMDs=patients with neuromuscular diseases, S-RBD=SARS-CoV-2 S receptor-binding domain, sVNT=surrogate virus neutralization test \*\*\*\* $p < 0.0001$
